# Supplementary material for: Maximum ozone concentrations in the southwestern US and Texas: Implications of growing predominance of background contribution
Source: Copernicus journal article supplement (doi:10.5194/egusphere-2024-342), 2024-03-04
Supplement: Supplementary file 1 [file egusphere-2024-342-supplement.pdf]

1 *Supplement of*

2 **Maximum ozone concentrations in the southwestern US and Texas:**  
3 **Implications of the growing predominance of background ozone**

4 David D. Parrish, Ian C. Faloona, and Richard G. Derwent

5 *Correspondence to:* David D. Parrish (david.d.parrish.llc@gmail.com)

6

7

8

9

10

11 **Contents of this file**

12

13 Tables S1 to S7

14 Figures S1 to S9

15 Text S1 to S6

16

17

18 **Introduction**

19 This supporting information collects the parameter values derived from fits of Equations 3 and 4 to all ODV time  
20 series analyzed in this work in Tables S1 to S5. Figures S1 to S7 illustrate some of these fits and provide additional  
21 data presentations. Text S1 to S7 present additional discussion aspects of the observation-based model and model  
22 uncertainties.

23 **Table S1.** Parameter values (with 95% confidence limits) derived from fits of Equation 1 to time series of ODVs  
 24 time series from the isolated rural CASTNET sites.

| Site                   | $a$<br>(ppb) | $b$<br>(ppb yr <sup>-1</sup> ) | $c$<br>(ppb yr <sup>-2</sup> ) | year <sub>max</sub> | RMSD<br>(ppb) |
|------------------------|--------------|--------------------------------|--------------------------------|---------------------|---------------|
| Glacier NP             | 54.9 ± 1.1   | 0.09 ± 0.16                    | -0.010 ± 0.011                 | 2004 ± 9            | 1.2           |
| Yellowstone NP         | 65.9 ± 2.9   | -0.31 ± 0.67                   | +0.007 ± 0.032                 | ---                 | 1.7           |
| Craters of the Moon NM | 62.5 ± 3.8   | 0.16 ± 0.67                    | -0.009 ± 0.038                 | 2009 ± 51           | 2.4           |
| Lassen Volcanic NP     | 72.4 ± 2.7   | -0.05 ± 0.35                   | -0.016 ± 0.025                 | 1999 ± 11           | 3.1           |
| Great Basin NP         | 71.5 ± 2.1   | 0.14 ± 0.51                    | -0.020 ± 0.028                 | 2004 ± 13           | 2.0           |
| Canyonlands NP         | 70.3 ± 2.0   | 0.17 ± 0.46                    | -0.024 ± 0.024                 | 2003 ± 10           | 1.7           |
| Grand Canyon NP        | 72.5 ± 1.3   | 0.07 ± 0.21                    | -0.026 ± 0.014                 | 2001 ± 4            | 1.4           |
| Chiricahua NM          | 70.1 ± 1.7   | 0.19 ± 0.29                    | -0.020 ± 0.018                 | 2005 ± 8            | 1.8           |
| All sites              | 67.7 ± 1.9   | 0.09 ± 0.33                    | -0.018 ± 0.020                 | 2003 ± 10           | 5.9           |
| All sites - normalized | 71.3 ± 0.8   | 0.07 ± 0.13                    | -0.015 ± 0.008                 | 2002 ± 4            | 2.4           |

25

26

27 **Table S2.** Parameter values from fits of Equation 3 to time series of percentiles of maximum MDA8 ozone  
 28 concentration distributions recorded in the California air basins and calculated from the ozone sondes launched from  
 29 Trinidad Head CA. RMSD gives the root-mean-square deviations between the observed ozone concentrations and  
 30 the derived fits.

| <b>Data set</b>                   | <b><i>a</i> (ppb)</b> | <b><i>A</i> (ppb)</b> | <b>RMSD (ppb)</b> |
|-----------------------------------|-----------------------|-----------------------|-------------------|
| <b>Maximum</b>                    |                       |                       |                   |
| San Diego AB                      | 52.6 ± 13.4           | 58.6 ± 9.7            | 16.8              |
| SoCAB                             | 66.6 ± 13.4           | 95.8 ± 9.7            | 16.7              |
| SFB AB                            | 75.5 ± 9.6            | 25.1 ± 6.9            | 11.9              |
| North Coast AB                    | 65.4 ± 7.7            | 4.6 ± 6.0             | 12.0              |
| Ozone sondes                      | 76.5                  | ---                   | ---               |
| <b>98<sup>th</sup> percentile</b> |                       |                       |                   |
| San Diego AB                      | 58.6 ± 5.7            | 41.0 ± 4.1            | 7.1               |
| SoCAB                             | 60.8 ± 8.9            | 87.7 ± 6.4            | 11.1              |
| SFB AB                            | 70.2 ± 6.5            | 21.1 ± 4.7            | 8.0               |
| North Coast AB                    | 58.1 ± 5.7            | 4.3 ± 4.5             | 8.9               |
| Ozone sondes                      | 76.5                  | ---                   | ---               |
| <b>90<sup>th</sup> percentile</b> |                       |                       |                   |
| San Diego AB                      | 54.2 ± 3.5            | 32.5 ± 2.5            | 4.4               |
| SoCAB                             | 53.0 ± 5.6            | 76.6 ± 4.1            | 7.0               |
| SFB AB                            | 54.8 ± 5.1            | 18.5 ± 3.7            | 6.3               |
| North Coast AB                    | 47.6 ± 3.9            | 4.1 ± 3.0             | 6.1               |
| Ozone sondes                      | 52.3                  | ---                   | ---               |
| <b>75<sup>th</sup> percentile</b> |                       |                       |                   |
| San Diego AB                      | 49.5 ± 2.9            | 27.9 ± 2.1            | 3.7               |
| SoCAB                             | 50.0 ± 5.7            | 65.0 ± 4.1            | 7.1               |
| SFB AB                            | 45.6 ± 3.5            | 14.4 ± 2.5            | 4.3               |
| North Coast AB                    | 42.4 ± 3.2            | 3.0 ± 2.5             | 5.0               |
| Ozone sondes                      | 45.8                  | ---                   | ---               |
| <b>median</b>                     |                       |                       |                   |
| San Diego AB                      | 45.8 ± 3.0            | 21.5 ± 2.2            | 3.7               |
| SoCAB                             | 46.4 ± 5.9            | 50.8 ± 4.3            | 7.4               |
| SFB AB                            | 38.8 ± 2.8            | 10.9 ± 2.0            | 3.5               |
| North Coast AB                    | 37.6 ± 2.7            | 1.3 ± 2.1             | 4.2               |
| Ozone sondes                      | 39.3                  | ---                   | ---               |
| <b>25<sup>th</sup> percentile</b> |                       |                       |                   |
| San Diego AB                      | 43.2 ± 3.2            | 14.9 ± 2.3            | 4.0               |
| SoCAB                             | 45.6 ± 7.1            | 34.4 ± 5.1            | 8.8               |
| SFB AB                            | 33.8 ± 2.1            | 8.6 ± 1.5             | 2.6               |
| North Coast AB                    | 33.1 ± 2.7            | 0.5 ± 2.1             | 4.2               |
| Ozone sondes                      | 31.8                  | ---                   | ---               |
| <b>10<sup>th</sup> percentile</b> |                       |                       |                   |
| San Diego AB                      | 40.4 ± 2.8            | 10.1 ± 2.0            | 3.5               |
| SoCAB                             | 46.1 ± 6.9            | 18.0 ± 5.0            | 8.6               |
| SFB AB                            | 29.1 ± 2.0            | 7.7 ± 1.4             | 2.5               |
| North Coast AB                    | 29.3 ± 2.4            | -0.7 ± 1.9            | 3.7               |
| Ozone sondes                      | 25.7                  | ---                   | ---               |
| <b>Minimum</b>                    |                       |                       |                   |
| San Diego AB                      | 31.5 ± 4.1            | 4.4 ± 3.2             | 6.4               |
| SoCAB                             | 43.1 ± 4.4            | 0.1 ± 3.4             | 6.9               |
| SFB AB                            | 22.7 ± 3.0            | 5.2 ± 2.4             | 4.7               |
| North Coast AB                    | 20.7 ± 3.3            | -2.8 ± 2.6            | 5.1               |
| Ozone sondes                      | 5.8                   | ---                   | ---               |

31

32 **Table S3.** Parameter values from all fits of Equation 3 to time series of ODVs recorded in the southwestern US.

33 RMSD gives the root-mean-square deviations between the observed ODVs and the derived fits.

| Site(s)                        | $a$ (ppb)      | $A$ (ppb)      | Npts <sup>a</sup> | RMSD (ppb) | years     |
|--------------------------------|----------------|----------------|-------------------|------------|-----------|
| <b>CASTNET</b>                 |                |                |                   |            |           |
| CASTNET - normalized           | $68.5 \pm 1.5$ | $2.8 \pm 1.9$  | 212               | 2.3        | 1990-2021 |
| <b>Southwestern US - rural</b> |                |                |                   |            |           |
| AZ rural                       | $66.6 \pm 1.9$ | $5.4 \pm 2.5$  | 116               | 2.3        | 1990-2021 |
| Southern UT, Mesquite NV       | $64.8 \pm 3.6$ | $6.5 \pm 5.6$  | 66                | 2.6        | 1995-2021 |
| Four Corners area rural        | $69.6 \pm 4.3$ | $-2.7 \pm 6.6$ | 126               | 4.0        | 1996-2021 |
| Southern NM rural              | $69.4 \pm 5.5$ | $-1.3 \pm 8.0$ | 76                | 4.7        | 1992-2021 |
| CO rural                       | $69.0 \pm 3.1$ | $-1.9 \pm 4.4$ | 97                | 4.0        | 1986-2021 |
| <b>Southwestern US - urban</b> |                |                |                   |            |           |
| Phoenix                        | $69.0 \pm 1.7$ | $9.4 \pm 2.3$  | 658               | 4.8        | 1990-2021 |
| Phoenix max                    | $75.2 \pm 4.9$ | $10.2 \pm 5.4$ | 32                | 2.9        | 1990-2021 |
| Tucson                         | $63.9 \pm 1.4$ | $7.5 \pm 1.2$  | 264               | 3.4        | 1975-2021 |
| Tucson max                     | $66.2 \pm 2.9$ | $9.7 \pm 2.4$  | 38                | 2.3        | 1980-2021 |
| Las Vegas                      | $68.0 \pm 2.6$ | $11.6 \pm 3.8$ | 230               | 3.1        | 2000-2021 |
| Las Vegas max                  | $69.6 \pm 6.6$ | $15.4 \pm 9.9$ | 22                | 2.3        | 2000-2021 |
| Reno                           | $66.3 \pm 2.2$ | $4.9 \pm 2.4$  | 169               | 3.8        | 1982-2021 |
| Reno max                       | $67.1 \pm 4.8$ | $6.8 \pm 4.1$  | 39                | 3.8        | 1982-2021 |
| Salt Lake City                 | $66.6 \pm 1.9$ | $11.8 \pm 1.7$ | 351               | 5.2        | 1977-2021 |
| Salt Lake City max             | $68.9 \pm 4.3$ | $15.0 \pm 3.2$ | 43                | 3.8        | 1979-2021 |
| Albuquerque-Santa Fe           | $66.2 \pm 1.8$ | $4.0 \pm 1.7$  | 275               | 3.8        | 1981-2021 |
| Albuquerque-Santa Fe max       | $68.4 \pm 3.0$ | $5.3 \pm 2.4$  | 41                | 2.5        | 1981-2021 |
| Denver                         | $69.0 \pm 2.1$ | $8.0 \pm 1.7$  | 412               | 6.2        | 1974-2021 |
| Denver max                     | $74.7 \pm 2.1$ | $9.4 \pm 1.4$  | 47                | 4.3        | 1974-2021 |

34 <sup>a</sup> Npts gives the number of ODVs included in each fit

35 **Table S4.** Parameter values from fits of Equation 4 to time series of maximum ODVs recorded in southwestern US,  
 36 Texas and two other urban areas, TX, New York City, with the  $a$  parameter held at that derived for all ODVs in the  
 37 respective urban area. RMSD gives the root-mean-square deviations between the observed maximum ODVs and the  
 38 derived fits.

| Site(s)                        | $a$ (ppb) | $A_{WF}$ (ppb) | $WF$<br>(ppb) | RMSD<br>(ppb) | years     |
|--------------------------------|-----------|----------------|---------------|---------------|-----------|
| <b>Southwestern US - urban</b> |           |                |               |               |           |
| Phoenix max                    | 69.0      | 12.9 ± 3.6     | 1.6 ± 2.5     | 3.0           | 1990-2021 |
| Tucson max                     | 63.9      | 10.5 ± 1.6     | 1.4 ± 1.6     | 2.2           | 1980-2021 |
| Las Vegas max                  | 68.0      | 16.1 ± 6.6     | 0.8 ± 3.3     | 1.8           | 2000-2021 |
| Reno max                       | 66.3      | 7.0 ± 1.3      | 0.6 ± 1.4     | 3.8           | 1982-2021 |
| Salt Lake City max             | 66.6      | 15.6 ± 2.0     | 1.6 ± 2.5     | 3.7           | 1977-2021 |
| Albuquerque-Santa Fe max       | 66.2      | 6.0 ± 1.5      | 1.4 ± 1.7     | 2.5           | 1981-2021 |
| Denver max                     | 69.0      | 11.0 ± 1.7     | 4.0 ± 2.5     | 4.0           | 1974-2021 |
| <b>Other urban areas</b>       |           |                |               |               |           |
| Houston max                    | 53.9      | 54.4 ± 3.2     | 1.8 ± 2.0     | 3.6           | 1995-2021 |
| Dallas max                     | 57.7      | 43.0 ± 2.5     | 2.6 ± 1.2     | 1.7           | 2000-2021 |
| El Paso max                    | 64.6      | 14.2 ± 2.1     | 3.2 ± 2.8     | 4.3           | 1977-2021 |
| New York City max              | 52.2      | 39.7 ± 2.3     | 3.1 ± 1.2     | 3.7           | 2000-2021 |
| Atlanta max                    | 49.1      | 54.4 ± 9.9     | 1.2 ± 6.1     | 5.4           | 1995-2021 |

39

40

41 **Table S5.** Parameter values from all fits of Equation 3 to time series of ODVs recorded in nine Texas regions and  
 42 neighboring states. RMSD gives the root-mean-square deviations between the observed ODVs and the derived fits.

| Site(s)                     | $a$ (ppb)  | $A$ (ppb)         | Npts <sup>a</sup> | RMSD<br>(ppb) | years     |
|-----------------------------|------------|-------------------|-------------------|---------------|-----------|
| <b>CASTNET</b>              |            |                   |                   |               |           |
| CASTNET - normalized        | 68.5 ± 1.5 | 2.8 ± 1.9         | 212               | 2.3           | 1990-2021 |
| <b>Texas Regions</b>        |            |                   |                   |               |           |
| Dallas region               | 57.7 ± 3.1 | 34.6 ± 4.5        | 422               | 5.9           | 1995-2021 |
| Houston region              | 53.9 ± 3.2 | 43.2 ± 4.2        | 478               | 6.7           | 1995-2021 |
| El Paso region              | 64.6 ± 1.8 | 11.5 ± 1.7        | 366               | 4.9           | 1976-2021 |
| San Antonio region          | 58.4 ± 4.1 | 26.6 ± 6.3        | 138               | 3.9           | 2000-2021 |
| Beaumont-PA-LC              | 54.7 ± 3.4 | 28.0 ± 5.1        | 230               | 4.0           | 2000-2021 |
| So Coast Texas              | 52.1 ± 4.1 | 27.5 ± 6.0        | 63                | 2.5           | 2000-2021 |
| SW Texas                    | 49.8 ± 4.9 | 18.2 ± 6.9        | 72                | 3.1           | 2000-2021 |
| Tyler-LV-SP                 | 50.8 ± 4.6 | 37.3 ± 6.8        | 89                | 3.5           | 2000-2021 |
| Western rural region        | 64.9 ± 5.8 | 3.2 ± 8.1         | 50                | 3.5           | 1989-2017 |
| <b>Other Western States</b> |            |                   |                   |               |           |
| Oklahoma                    | 56.6 ± 2.8 | 25.1 ± 4.4        | 365               | 4.0           | 2000-2021 |
| Louisiana                   | 54.3 ± 2.3 | 29.9 ± 3.3        | 519               | 4.2           | 2000-2021 |
| Arkansas                    | 48.2 ± 4.7 | 37.5 ± 7.6        | 141               | 4.5           | 2000-2021 |
| Kansas                      | 56.6 ± 4.2 | 20.2 ± 6.6        | 174               | 4.3           | 2000-2021 |
| Nebraska                    | 56.5 ± 4.0 | 7.4 ± 3.6         | 146               | 6.6           | 1980-2021 |
| Montana                     | 58.6 ± 1.6 | 1.25 <sup>b</sup> | 99                | 4.7           | 1979-2021 |
| North Dakota                | 59.6 ± 0.9 | 1.25 <sup>b</sup> | 181               | 3.6           | 1982-2021 |
| South Dakota                | 62.2 ± 1.7 | 1.25 <sup>b</sup> | 80                | 4.4           | 1990-2021 |
| Wyoming                     | 64.2 ± 0.6 | 1.25 <sup>b</sup> | 227               | 2.8           | 1999-2021 |

43 <sup>a</sup> Npts gives the number of ODVs included in each fit

44 <sup>b</sup> Fit with  $A$  parameter value held fixed at this value

45 **Table S6.** Two-letter state abbreviations

| State                |    | State          |    | State          |    |
|----------------------|----|----------------|----|----------------|----|
| Alabama              | AL | Kentucky       | KY | North Dakota   | ND |
| Alaska               | AK | Louisiana      | LA | Ohio           | OH |
| Arizona              | AZ | Maine          | ME | Oklahoma       | OK |
| Arkansas             | AR | Maryland       | MD | Oregon         | OR |
| California           | CA | Massachusetts  | MA | Pennsylvania   | PA |
| Colorado             | CO | Michigan       | MI | Rhode Island   | RI |
| Connecticut          | CT | Minnesota      | MN | South Carolina | SC |
| Delaware             | DE | Mississippi    | MS | South Dakota   | SD |
| District of Columbia | DC | Missouri       | MO | Tennessee      | TN |
| Florida              | FL | Montana        | MT | Texas          | TX |
| Georgia              | GA | Nebraska       | NE | Utah           | UT |
| Hawaii               | HI | Nevada         | NV | Vermont        | VT |
| Idaho                | ID | New Hampshire  | NH | Virginia       | VA |
| Illinois             | IL | New Jersey     | NJ | Washington     | WA |
| Indiana              | IN | New Mexico     | NM | West Virginia  | WV |
| Iowa                 | IA | New York       | NY | Wisconsin      | WI |
| Kansas               | KS | North Carolina | NC | Wyoming        | WY |

46

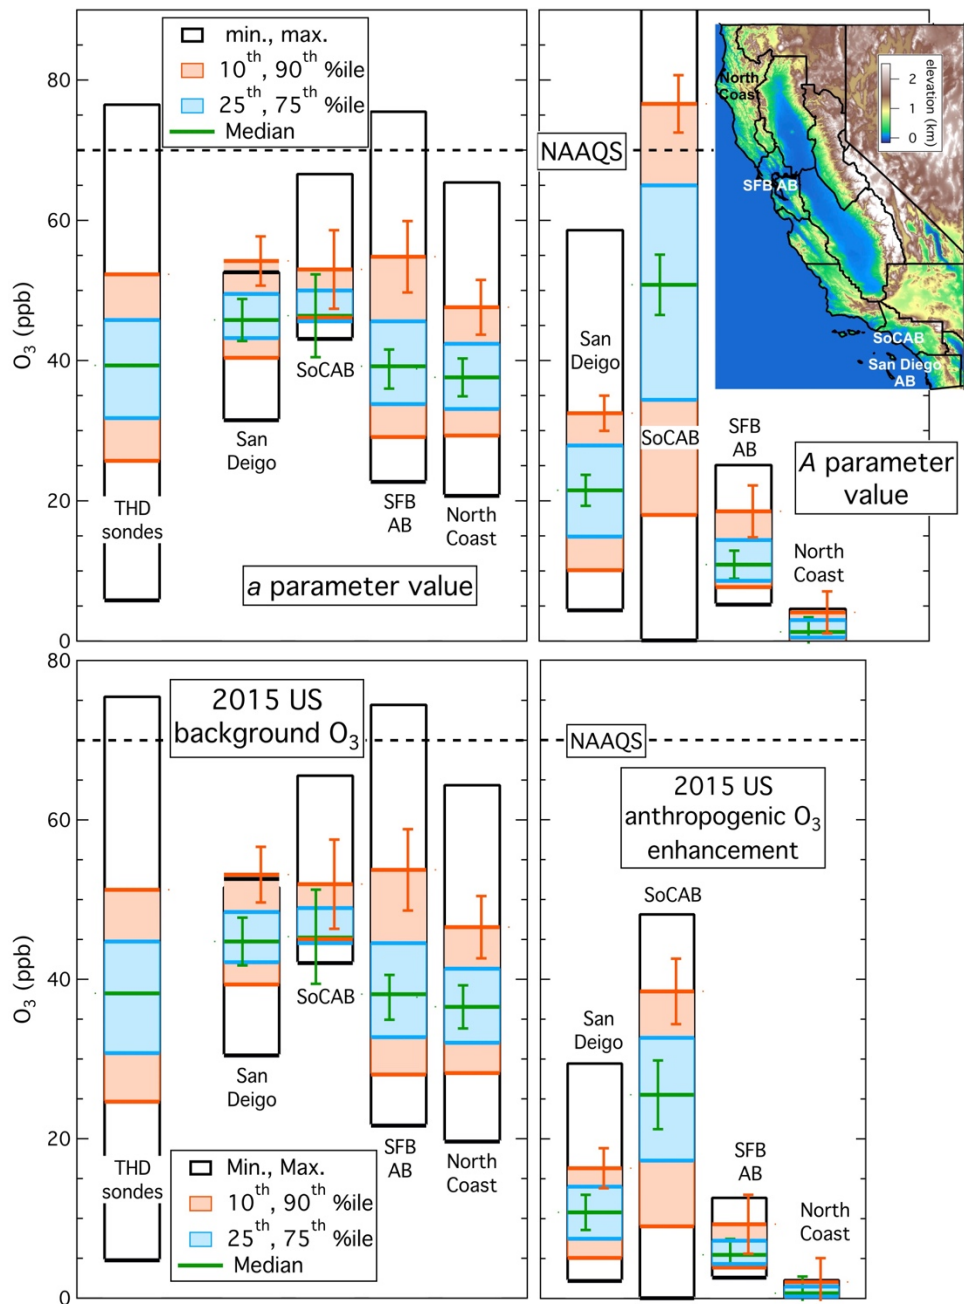

47

48

49 **Figure S1.** Comparison of distribution of ozone concentrations measured between 0.6 and 1 km altitude by sondes  
 50 launched from Trinidad Head from May through September, 1997-2017 (left bar in two left graphs) and  
 51 distributions of **(top)** *a* and *A* parameter values and **(bottom)** year 2015 US background ozone contribution and US  
 52 anthropogenic ozone enhancement derived from the temporal evolution of maximum MDA8 ozone concentrations  
 53 measured in 4 coastal California air basins. Figure 2 of the manuscript illustrates that MDA8 evolution. Error bars  
 54 on the median and 90<sup>th</sup> percentile lines indicate estimated uncertainties. The inset map identifies the 4 air basins,  
 55 with the black lines indicating the air basin boundaries.

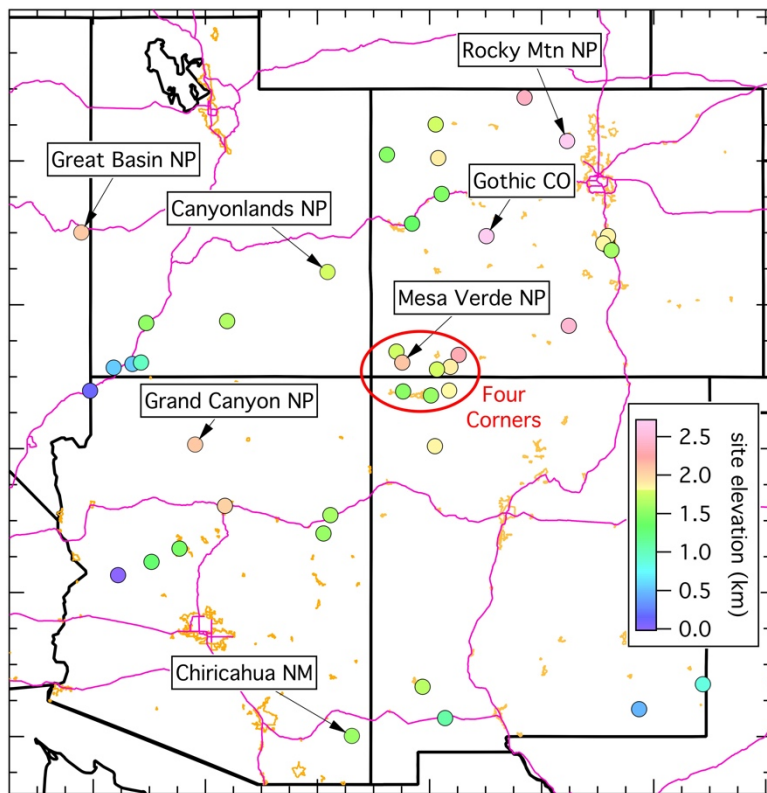

56

57 **Figure S2.** Map of southwestern US rural monitoring sites; the symbols are color-coded according to site elevation  
 58 as annotated. Lines indicate outlines of southwestern US states (black), urban areas (gold) and interstates and  
 59 selected other major highways (violet). ODV time series from rural areas whose sites are analyzed together as  
 60 separate data sets are included in Figure S3. Locations of specific CASTNET sites as well as the Four Corners  
 61 area are annotated.



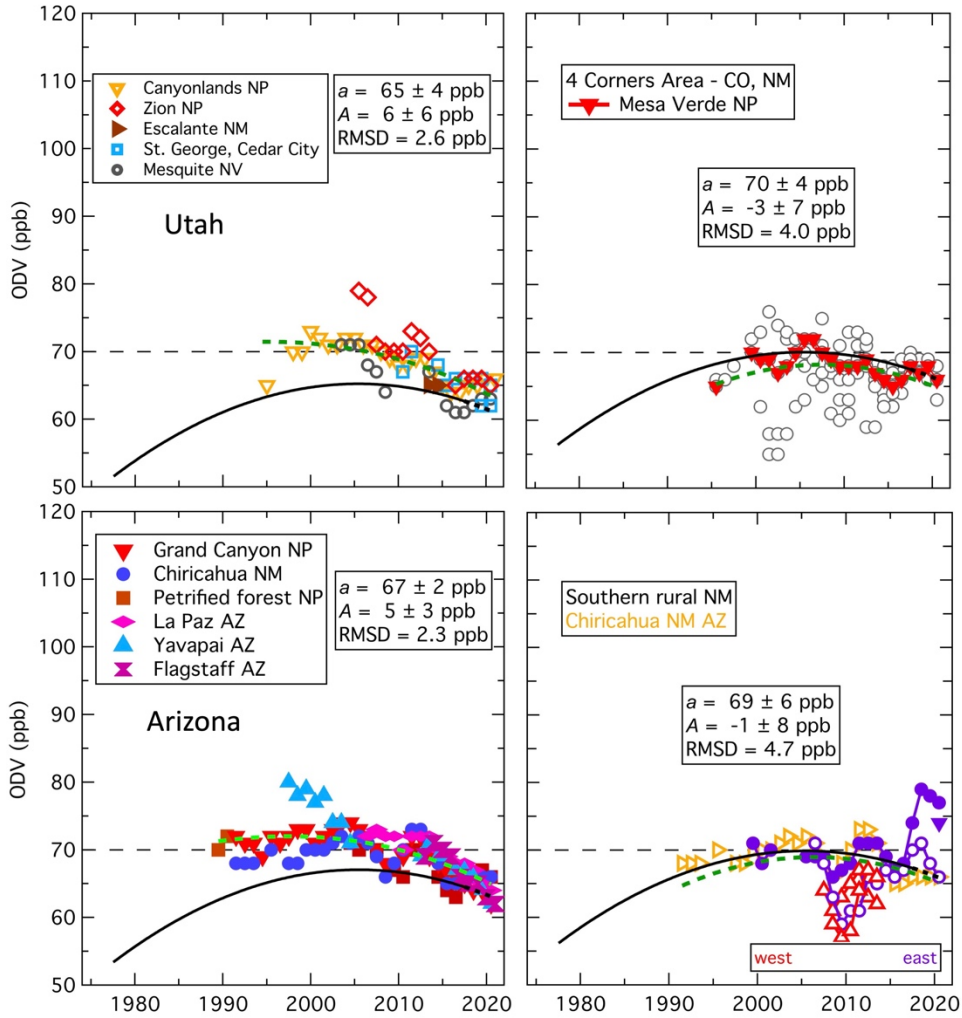

62

63

64

65

66

67

**Figure S3.** Time series of ODVs recorded in four southwestern US rural areas shown in Figure S2. Symbols indicate different sites as annotated. The southern NM sites are identified as western and eastern by different colors. Green dashed curves indicate fits of Equation 3 to all ODVs, with the parameters derived in the fit annotated. The black solid curves with dashed extensions indicate the fit to the baseline data from Figure 1, normalized to the respective  $a$  parameter values. The light dashed lines indicate the 70 ppb ozone NAAQS.

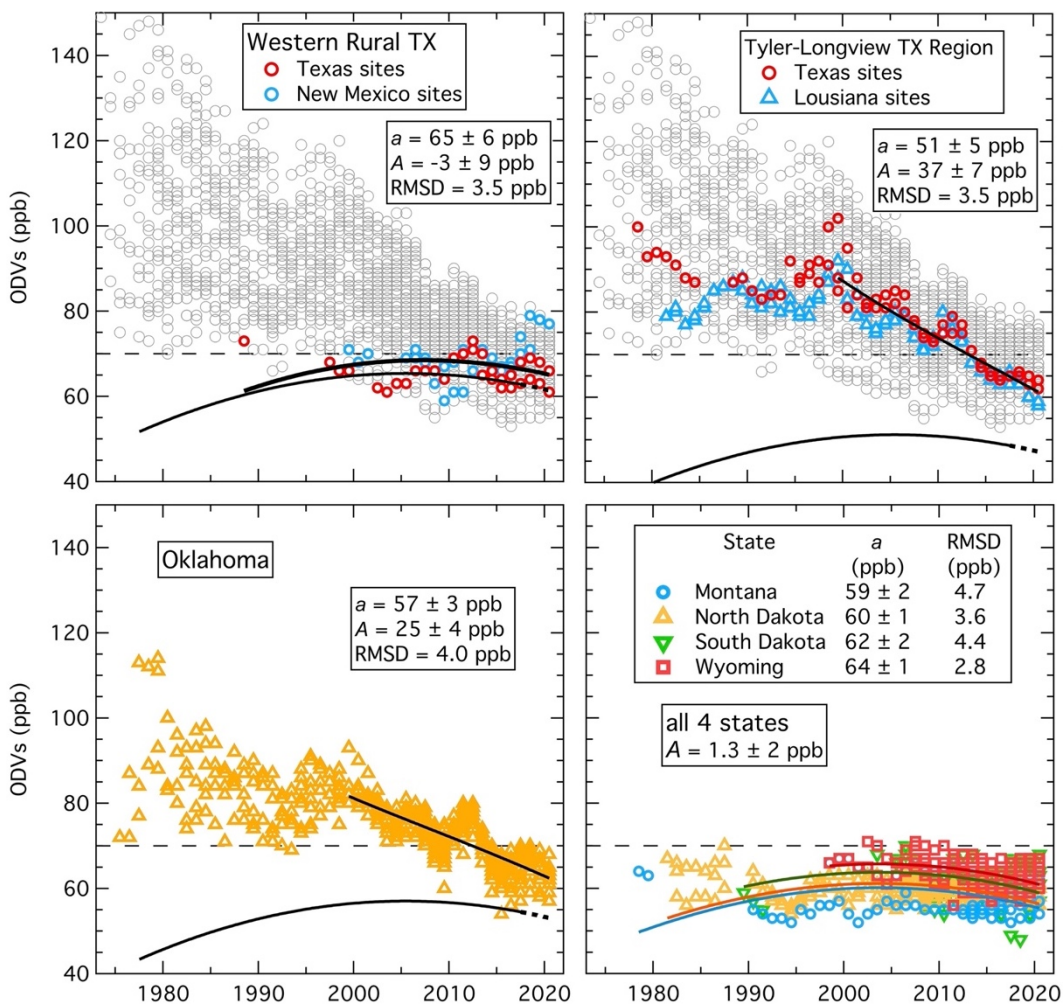

68

69 **Figure S4. (upper graphs)** Time series of ODVs recorded in two of the Texas regions shown in Figure 7 of the  
 70 manuscript. Grey symbols in each graph indicate all recorded Texas ODVs. Colored symbols indicate the  
 71 ODVs from each respective area. Upper curves indicate fits of Equation 3 to all ODVs in the area; the  
 72 parameters derived in these fits are annotated. Lower curves with dashed extensions indicate the fit to the  
 73 baseline data from Figure 1, but here normalized to the respective  $a$  parameter values. **(lower graphs)** Time  
 74 series of ODVs recorded in Oklahoma and the four northern rural states. For Oklahoma upper curve indicates fit  
 75 of Equation 3 to all ODVs in the state for 2000-2021; the parameters derived in this fit is annotated. Lower  
 76 curve with dashed extension indicates the fit to the baseline data from Figure 1, normalized to the  $a$  parameter  
 77 value derived for Oklahoma. For the northern states the curves indicate fits of Equation 3 to all ODVs recorded  
 78 in each state; in these fits the  $A$  parameter value is fixed at 1.25 ppb. The derived  $a$  parameter values are  
 79 annotated. In all graphs, the light dashed lines indicate the 70 ppb ozone NAAQS.

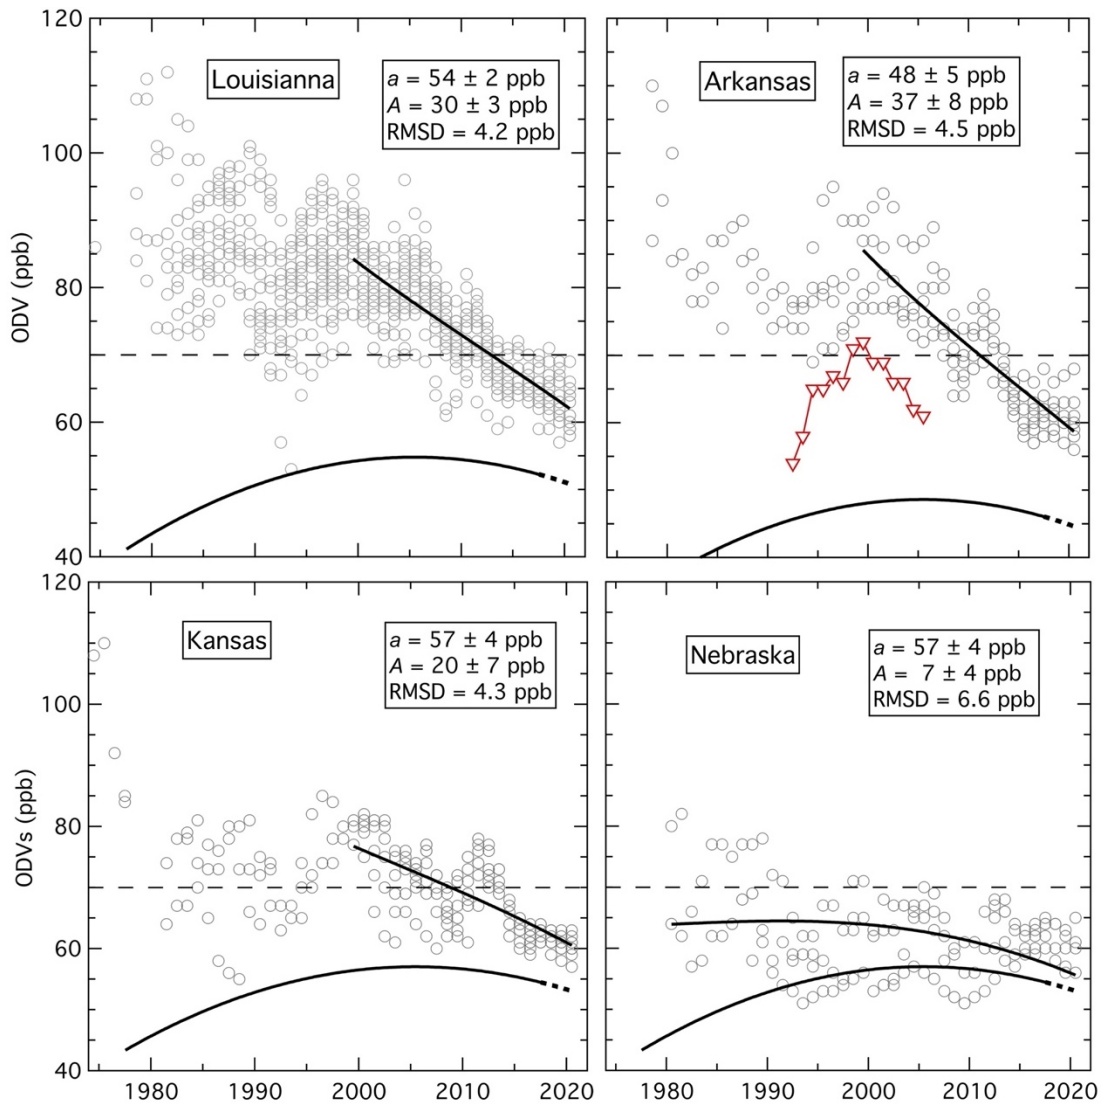

80

81 **Figure S5.** Analysis of time series of ODVs recorded in four neighboring states. Grey symbols in each graph  
 82 indicate all recorded ODVs in the states. Upper curves indicate fits of Equation 3 to all ODVs in the respective  
 83 states. The parameters derived in these fits are annotated. Lower curves with dashed extensions indicate the fit to the  
 84 baseline data from Figure 1, normalized to the respective  $a$  parameter values. Colored symbols in Arkansas indicate  
 85 the ODVs from a single site that appear to be outliers, and are excluded from the fit.

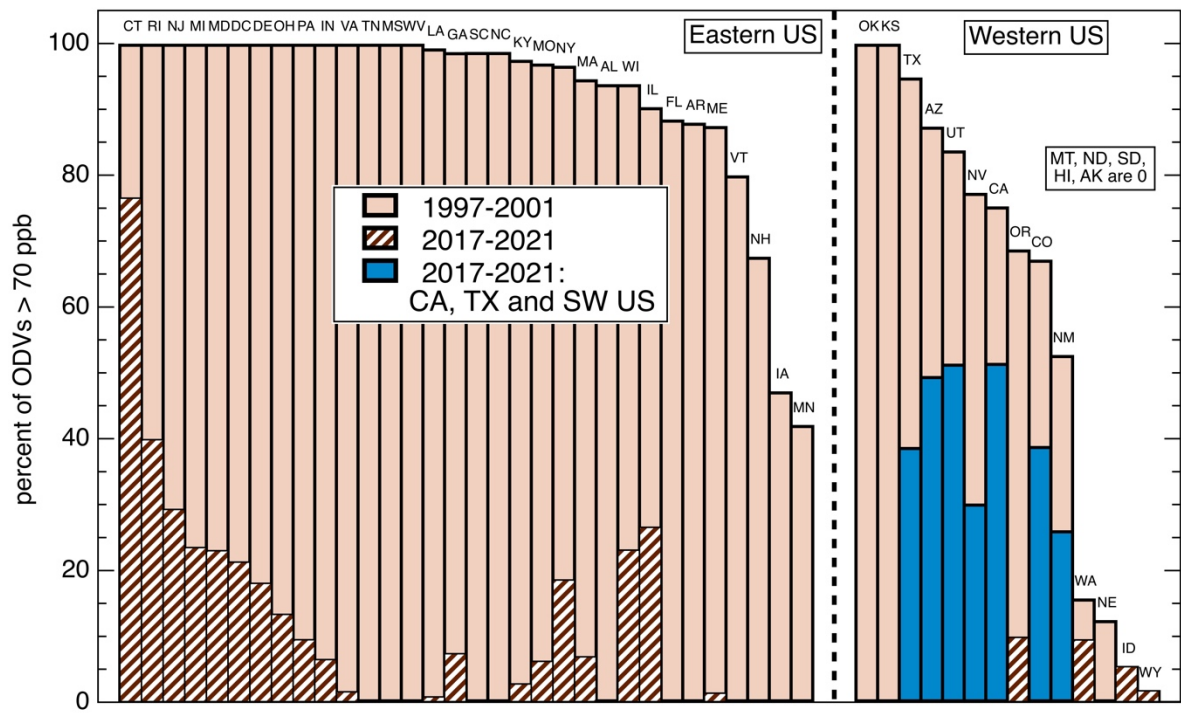

86

87  
88  
89  
90  
91  
92

**Figure S6.** Comparison of percentage of ODVs greater than 70 ppb recorded at all sites in individual states over two 5-year periods: 2017-2021 (hatched and dark blue bars) and a period 20 years earlier - 1997-2001 (light-colored bars). Individual states are indicated by their two letter abbreviations (defined in Table S6). States are arbitrarily divided between eastern and western regions. Southwestern states, Texas and California are indicated by solid dark blue bars. Five states, all in the western region, reported no ODVs greater than 70 ppb. Format is the same as Figure 9 of the manuscript.

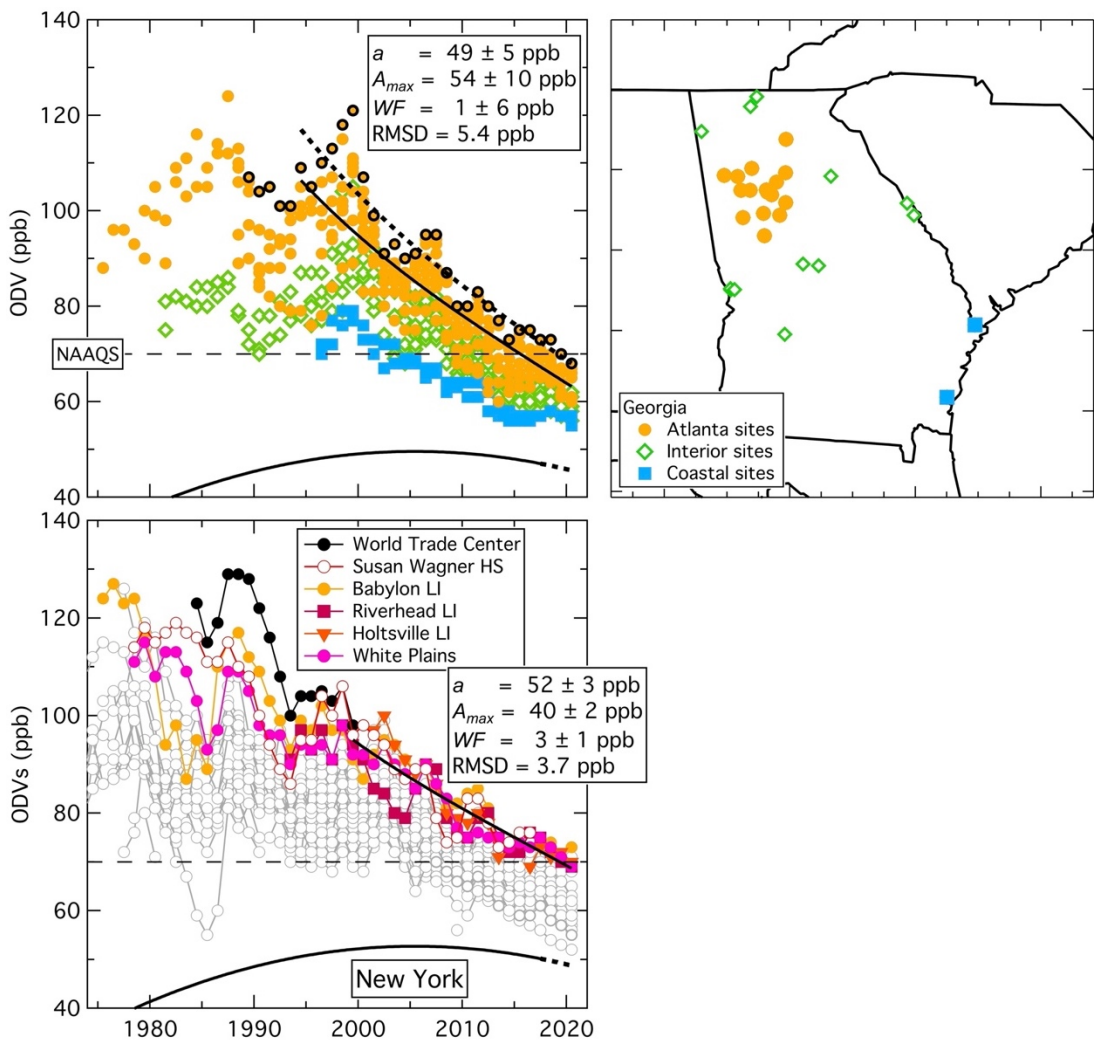

93

94 **Figure S7.** Analysis of time series of ODVs recorded in two eastern urban areas – Atlanta GA and New York City  
 95 NY. In Georgia ODVs from three groups of sites are indicated with different symbols. Grey symbols in lower graph  
 96 indicate all recorded ODVs in NY. In the GA graph, upper solid curve indicates fit of Equation 3 to all Atlanta  
 97 ODVs and the dotted curve indicates fit of Equation 4 to maximum Atlanta ODVs indicated by outlined circles. In  
 98 NY graph, upper solid curve indicates fit of Equation 4 to the ODVs recorded at the sites representing the maxima in  
 99 New York City. The parameters derived in the fits to Equation 4 are annotated. Lower curves with dashed  
 100 extensions indicate the fit to the baseline data from Figure 1, normalized to the respective  $a$  parameter values. The  
 101 light dashed lines indicate the 70 ppb ozone NAAQS.

## 102 **S1. Uncertainty of observation-based and chemical transport model results**

103 Equation 3 provides excellent fits to long-term ozone changes in diverse US regions. As written, Equation 3 has  
104 5 adjustable parameters ( $a$ ,  $b$ ,  $c$ ,  $A$ ,  $\tau$ ); however 3 of these are constants whose values have been determined in  
105 previous analyses. Parrish et al. (2020) determined values for  $b = 0.20 \pm 0.06$  ppb yr<sup>-1</sup> and  $c = 0.018 \pm 0.006$  ppb yr<sup>-2</sup>  
106 that were the same within derived confidence limits throughout northern midlatitudes. Parrish et al. (2021a) show  
107 that these results are consistent with results from 28 published quantifications of changes in average surface ozone  
108 concentrations at remote and rural western US locations that are thought to represent background ozone transported  
109 into North America. Parrish et al. (2017; 2022) determined a value of  $\tau = 21.8 \pm 0.8$  years from the time dependence  
110 of ODVs in 7 southern California air basins. This same value (within confidence limits) fit ODV time series  
111 throughout the western and northern US (Parrish et al., 2022) and in the northeastern US (Parrish and Ennis, 2019).  
112 Substitution of these values for  $b$ ,  $c$  and  $\tau$  into Equation 3 leaves only 2 unknown parameters:  $a$  and  $A$ . Section 4 of  
113 the paper shows that the resulting Equation 3 with varying  $a$  and  $A$  parameter values provides excellent fits to all  
114 percentiles of the distributions of the maximum MDA8 ozone concentrations in 4 urban and rural California air  
115 basins (Figure 2), and also to ODV time series recorded at rural and remote western US CASTNET sites (Figure 1),  
116 at urban and rural sites throughout the southwestern US and Texas (Figures 5, 6 and 8), and in surrounding and more  
117 distant US states (Figures S3-S5 and S7). Previous work (Parrish et al, 2017; 2022; Parrish and Ennis, 2019)  
118 demonstrate that same equation (or one closely related) provides excellent fits to ODV time series recorded urban  
119 and rural sites along the entire US West Coast, in the northern rural states and in the northeastern US.

120 It is widely accepted that photochemical ozone production involves a very complex set of physical and chemical  
121 processes, and that complexity causes ambient ozone concentrations to exhibit a highly non-linear dependence upon  
122 precursor concentrations (see e.g., Monks et al., 2015). The excellent fits of a 2 parameter equation to a great  
123 number of long-term ozone concentration time series recorded in a widely diverse range of environments  
124 demonstrates that there is an underlying simplicity to the evolution of ozone concentrations throughout the US,  
125 notwithstanding the complexity of ozone photochemistry. Fully understanding the origins of this simplicity may  
126 provide a very useful challenge for CTMs studies.

127 In previous papers we have discussed inconsistencies between results of observation-based and chemical  
128 transport model (CTM) simulations, and among results from different CTM simulations. Section 3.4 and Figure 6 of  
129 Parrish et al. (2017) show seven CTM-derived US background ODV estimates for southern California air basins that  
130 varied from ~45 to ~65 ppb, with one outlier of 92 ppb; the observational-derived value of 62 ppb agrees well with  
131 one of those model results, although it is larger than most others. In their Section 4.2 Parrish and Ennis (2019)  
132 compare results from three CTMs with those from our observational-based approach in five US regions; these  
133 comparisons show significant spatial correlation between approaches ( $r^2$  values for different CTMs with the  
134 observational-based results vary from 0.31 to 0.90), but the CTMs are, on average, systematically lower by 4 to 13  
135 ppb. Zhang et al. (2020) find disagreements of similar magnitude between CTMs; US background ozone estimates  
136 from two state-of-the-art global models differed by 5 ppb on average and up to 15 ppb episodically. These  
137 disagreements have led to the increasing recognition that CTMs are not yet able to provide accurate estimates of



138 atmospheric ozone concentrations without incorporating additional information from observations; see, e.g., Skipper  
139 et al. (2021) and Hosseinpour et al. (2023).

140 The following Sections S2-S7 discuss several issues regarding the assumptions and uncertainty of our  
141 observation-based approach.

## 142 **S2. Relationship of US background ODV to ozone exceedance days**

143 (Note: A previous version of some of this material was originally included in the Supplement to Parrish et al., 2022 -  
144 <https://www.tandfonline.com/doi/suppl/10.1080/10962247.2022.2050962?scroll=top&role=tab>)

145 One important question lacks a definitive answer: Are the four days that record the highest MDA8 ozone  
146 concentrations, i.e., the days that determine the ODV at present, the same four days that correspond to the highest  
147 US background, i.e., the days that would determine the ODV in the absence of anthropogenic precursor emissions?  
148 In other words, do the present highest ozone days also correspond to the days with the largest background ozone?  
149 Photochemical models provide a direct answer, but given the uncertainty associated with modeled background  
150 ozone concentrations on specific days (estimated as >10 ppb by Jaffe et al., 2018) this answer is likely not reliable.  
151 From our observational perspective, we cannot directly answer this question; however observation-based analyses  
152 can illuminate this question. It is useful to consider a heuristic example based on artificial data that illustrates some  
153 important considerations when considering this issue.

154 Figure S8 represents an imaginary world that has no meteorological variability; every day is exactly like every  
155 other, except that there are gradual seasonal changes. The upper graph shows how MDA8 ozone might vary  
156 seasonally at a particular measurement site (black curves decreasing in amplitude over time due to emission  
157 controls.) With no US anthropogenic precursor emissions, ozone would equal the US background ozone (blue curve,  
158 assumed to average 40 ppb with a sinusoidal variation of 20 ppb amplitude), and would vary smoothly over the year,  
159 repeating identically each year. The US background ODV (i.e., the quantity we estimate in our work, which here is  
160 assumed constant) would then be given by the blue symbol very near the peak of the blue curve.

161 US anthropogenic ozone precursor emissions in 2000 are assumed to increase the background ozone by an  
162 amount given by the red curve (average 35 ppb with a sinusoidal variation of 40 ppb amplitude). The blue and red  
163 curves are 3 months out of phase, in approximate accord with observed Northern Hemisphere background free-  
164 tropospheric ozone concentrations that peak in the spring (April/May) and many urban areas that peak in mid to late  
165 summer. The total ozone measured in 2000 would then be given by the highest black curve, and the site ODV given  
166 by the highest black symbol. Subtraction of the US background ODV from the site ODV gives the US  
167 anthropogenic ODV enhancement in 2000 as indicated by the red arrow. Notably, that quantity (60 ppb) is smaller  
168 than the US anthropogenic contribution to the ODV in 2000 (~71 ppb, given by orange arrow). This illustration lies  
169 at the heart of a common misunderstanding: the US background ODVs reported in this work are not the same as the  
170 current contributions of background ozone to current ODVs, because the maxima of background ozone and  
171 anthropogenic enhancements are offset from each other in the time of year when they occur. Nevertheless, when  
172 considering progress in reducing US anthropogenic precursor emissions, the US background ODV is still germane  
173 for considerations of compliance with the NAAQS.

174 Now we assume that the US anthropogenic  
 175 ozone production decreases exponentially with a  
 176 time constant of 20 years. Consequently, the total  
 177 measured ozone (black curves) decreases year-by-  
 178 year, with the ODVs (black symbols) also  
 179 decreasing, and simultaneously shifting to earlier in  
 180 the year, and approaching the US background  
 181 ODV (i.e., the blue symbol).

182 As shown in the lower graph of Figure S8, the  
 183 changes in site ODVs (black symbols in both  
 184 graphs) are well fit by an exponential decay, as  
 185 given by Equation 3 of the manuscript. The derived  
 186 parameter  $a = 60.0 \pm 0.4$  ppb agrees with the 60  
 187 ppb maximum of the blue curve, and the parameter  
 188  $A = 59.8 \pm 0.3$  ppb agrees with the 60 ppb  
 189 magnitude of the year 2000 US anthropogenic  
 190 ODV enhancement (red arrow in figure).

191 An important conclusion from this illustrative  
 192 example is that confusion can arise if a clear  
 193 distinction is not made between the US  
 194 anthropogenic ODV enhancement in 2000 (i.e., the  
 195 red arrow), the anthropogenic contribution to the  
 196 site ODV (i.e., the orange arrow) and the  
 197 anthropogenic ozone production (i.e., the red  
 198 curve, which varies during the year).

199 One implication of this example is that episode  
 200 days (i.e., those exhibiting the highest ozone) in  
 201 earlier decades are not seasonally coincident with  
 202 present episode days, and neither of those sets of  
 203 episode days is seasonally coincident with future  
 204 episode days. This is due to the growing relative  
 205 importance of background ozone (which is larger  
 206 in spring and early summer) as the magnitude of  
 207 local and regional photochemical production,  
 208 which is larger later in the summer, decreases. In actuality, episode days in southern California air basins have been  
 209 observed to systematically move toward the spring from later in the summer; Parrish et al. (2017) show that when  
 210 monitoring began in the South Coast Air Basin of California (i.e., the Los Angeles urban area) in the early 1970s,  
 211 the average ozone episode day occurred in late July, but had progressively moved to early July by 2015. This

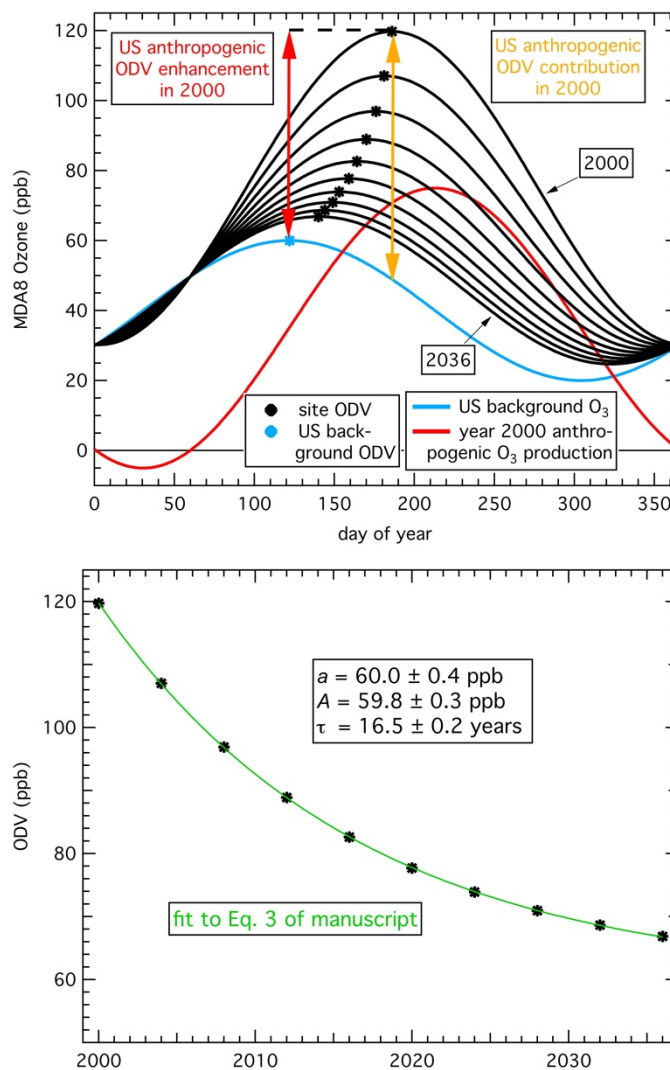

**Figure S8:** Schematic variation of ozone at a measurement site. **(top)** Blue and red curves give the assumed constant US background ozone and the US anthropogenic ozone production in the year 2000, respectively. The black curves are the total observed ozone in the year 2000 and at progressively later 4-year intervals. The US background ODV is given by the blue symbol, and the site ODVs are given by the black symbols at the peak of their respective curves. The year 2000 US anthropogenic ODV enhancement and anthropogenic ODV contribution are given by the red and orange arrows, respectively. **(bottom)** Temporal evolution of site ODVs from upper graph, fit to Equation 3 of the manuscript, with derived parameters annotated.



212 seasonal shift of episode days adds considerable uncertainty to photochemical modeling for State Implementation  
213 Plan (SIP) development. The meteorological conditions (including the background ozone contribution) on the days  
214 that will require the greatest emission control efforts to lower the MDA8 ozone to the NAAQS is uncertain. The  
215 common assumption that those days correspond to the present maximum episode days is not valid, since days with  
216 higher background ozone concentrations may require even greater emission reductions to reach the NAAQS, even if  
217 they now are not the days when the highest ozone is observed.

218 It should also be noted that an observation-based analysis has indicated a significant positive correlation between  
219 maximum observed ozone concentrations and high background ozone concentrations. Parrish et al. (2010) show that  
220 MDA8 ozone measured at surface sites in California's Northern Sacramento Valley correlates positively (correlation  
221 coefficients as large as +0.53 at valley sites and +0.71 at an elevated surface site) with baseline ozone concentrations  
222 measured by sondes launched from the upwind location at Trinidad Head on the northern California coast. This  
223 analysis suggests that the days that determine the ODV will progressively tend to be the days of highest US  
224 background ozone concentration as anthropogenic ozone contributions are further reduced.

225 It has been argued (e.g., see Section 1.8 of US EPA, 2020) that the highest US ozone concentrations occur during  
226 periods of low background ozone contributions. This argument is based on the reasoning that the largest background  
227 ozone contributions occur on spring days with strong convective mixing when ozone generated in the stratosphere or  
228 during long-range transport of Asian or natural precursors in the upper troposphere are more readily mixed to the  
229 surface. In contrast, the highest US ozone concentrations are thought to occur during multiday episodes under  
230 stagnant conditions when an air mass remains stationary over a region abundant in anthropogenic ozone precursor  
231 sources. However, this reasoning does not apply to the southwestern US, because surface ozone concentrations are  
232 strongly correlated with higher ambient temperatures, and higher temperatures are correlated with deeper  
233 atmospheric boundary layers (ABL) in this area. Examination of the climatology of ABL heights over western North  
234 America shows that in summer, when most ozone NAAQS violations occur, boundary layers tend to be deepest (see  
235 figure 5 of von Engel and Teixeira, 2013). Deeper boundary layers develop due to greater vertical mixing driven by  
236 strong surface heating (i.e., entrainment). A recent paper (Langford et al., 2022) emphasizes that layers with  
237 elevated ozone concentrations above Las Vegas were commonly entrained into the ABL and thereby contributed to  
238 mean MDA8 regional background ozone concentrations of 50–55 ppb; note that our paper analyzes ODVs, which  
239 represent ~98<sup>th</sup> percentile MDA8 concentrations, and, as expected, the US background ODVs that we quantify are  
240 substantially larger than the 50–55 ppb mean background ozone discussed by Langford et al. (2022).

241 Photochemical modeling in support of air quality policy development has generally focused on days exhibiting  
242 the largest MDA8 ozone concentrations. This choice is based on the implicit assumption that such days represent the  
243 meteorological conditions under which it will be most difficult to reduce the MDA8 to the NAAQS. Importantly, the  
244 US background ODV that is the focus of our analysis may not occur on those same days. Photochemical modeling  
245 on days with larger US background ODVs will be very informative, but such days are difficult to specifically  
246 identify.

247 **S3. Approximation of long-term change of US anthropogenic ODV enhancements by an exponential decrease**

248 An exponential function is chosen to approximate the long-term decrease of US anthropogenic ODV enhancements  
249 because it a) is consistent with our physical understanding of the drivers of urban and rural ozone concentrations, b)  
250 is a continuous function, c) is mathematically as simple as possible (i.e., has the fewest possible unknown  
251 parameters), and d) successfully accounts for a large fraction of the variance in recorded ODV time series  
252 throughout the US.

253 Any functional form selected for interpretation of an ODV time series must be consistent, first, with a  
254 background contribution below which ODVs cannot be reduced by U.S. precursor emission controls alone, and  
255 second, with ODVs that have been enhanced above that background due to a pollution contribution, an enhancement  
256 that has continually decreased due to decades-long precursor emission reduction efforts. Equation 3 of the  
257 manuscript is designed to follow this physical picture. More generally, examination of ozone observations in US  
258 urban areas reveals similar trends throughout the country, with general decreases in all areas. A simple intuitive  
259 argument suggests that an exponential decrease in the pollution ozone contribution is to be expected. When emission  
260 controls are initiated, early progress can be rapid, since there are large emission sources that evolved initially with  
261 no plans for their control. As an illustrative example, when emission controls are first initiated it might be possible  
262 to reduce the pollution ozone contribution by half in the first 15 years of control efforts. After that period reducing  
263 emissions will be harder, since the most easily controlled emissions have been addressed. During the next 15 years,  
264 it might be possible to again reduce the remaining pollution ozone contribution by half (i.e., reduction of 25% of the  
265 original). A similar argument can be applied to each successive 15-year period. If this example were realistic, then  
266 the emission reductions would follow an exponential function, with  $\tau = 21.6$  years, close to the value of  $\tau = 21.8 \pm$   
267  $0.8$  years reported by Parrish et al. (2022). Simply put, the expected increasing difficulty of reducing emissions by  
268 an absolute amount implies an approximately exponential decrease in the impact of those emissions.

269 Despite the large variability of tropospheric ozone on a wide spectrum of temporal scales, the underlying long-  
270 term changes in ODVs are expected to be continuous, since they are determined by slowly varying drivers such as  
271 changes in anthropogenic precursor emissions, land use (which affects natural precursor emissions), and climate.  
272 Exceptions might include rapid societal changes, such as occurred during the COVID-19 epidemic response, and  
273 volcanic eruptions; however, no discontinuous long-term changes have been encountered in all of the US ODV time  
274 series we have analyzed. Thus, the choice of the exponential function, which is continuous, is again indicated.

275 The exponential term of Equation 3 -  $A \exp(-t/\tau)$  - with two parameters is the simplest possible functional form  
276 that can capture the behavior of the pollution enhancement. Each ODV is a three-year average; hence a three-decade  
277 ODV time series provides only 10 independent data. The ODVs have significant short-term variability (e.g., Guo et  
278 al., 2018), so an attempt to quantify systematic, long-term changes from available ODV time series requires fitting  
279 to no more than a simple mathematical function for that quantification. That is, to yield precise determinations of the  
280 values of the function's parameters the function must have as few unknown parameters as possible. A linear  
281 function, also with two parameters - slope and intercept - is often utilized for time series fits; it is as mathematically  
282 simple as an exponential function, but a linear fit to a decreasing trend will eventually become negative, and  
283 therefore cannot generally be consistent with a positive background contribution. A linear decrease that ends when it

284 intersects a background function, such as a constant or the function given by the first three terms of Equations 3 and  
285 4 of the manuscript, requires only two parameters, but the resulting function is not continuous. Likewise, piece-wise  
286 linear fits are not continuous, and generally require at least four parameters to specify. Any other function that might  
287 be applied (e.g., a polynomial fit) would require more than two parameters. From a simplicity and continuity  
288 perspective, the chosen exponential function is uniquely suited for quantifying a decreasing ODV time series.

289 Finally, experience has shown that an exponential function gives excellent fits to the last two to five decades of  
290 ozone observed in US urban areas. In their section 2.4 Parrish et al. (2017) present a multivariate fit of Equation 3  
291 (but with a constant background term) to maximum ODV time series in seven southern California air basins over 35  
292 years; the  $r^2$  value for that fit is 0.984. In a similar analysis Parrish and Ennis (2019) find an  $r^2$  value of 0.89 for a  
293 shorter (17 year) period of time series of maximum ODVs recorded in eight northeastern states. Section S6 below  
294 discusses similar analyses for ODV time series analyzed in this manuscript, and again find large  $r^2$  values – 0.94 for  
295 eight Texas regions and 0.79 for the maximum ODV time series in eight southwestern US urban areas. These large  
296  $r^2$  values demonstrate that an exponential function accurately captures a large fraction (approximately equal to the  
297 respective  $r^2$  values) of the variance in the ODV time series in all US regions that we have investigated. These  
298 considerations demonstrate that an exponential function is a very effective choice for analysis of long-term ozone  
299 time series.

#### 300 **S4. Differing rates of decrease of anthropogenic precursor emissions are not directly treated**

301 Equation 3 includes only a single term to account for the influence of decreasing anthropogenic emissions on ODVs;  
302 that term depends on a single exponential time constant,  $\tau$ . However, different anthropogenic emission sectors may  
303 have differing time evolution of emissions, which may be expected to be reflected in the temporal evolution of  
304 ODVs. In effect,  $\tau$  in Equation 3 is assumed to represent an average, overall response of ODVs to decreasing  
305 anthropogenic emissions.

306 In this and previous work we discuss the impact of two anthropogenic emission sectors that have not decreased.  
307 First, southern California has regions of very intensive agricultural activity - the Imperial Valley in the Salton Sea  
308 Air Basin, the San Joaquin Valley Air Basin, and the Salinas Valley in the North Central Coast Air Basin; Parrish et  
309 al. (2017; 2022) note that derived  $a$  parameter values are biased high by  $\sim 5$  to 12 ppb in these locations, and thus  
310 cannot be interpreted as direct determinations of the US background ODV. Second, the development of Equation 4  
311 provides an approximate treatment of the increasing influence of wildfires on ODVs; a small wildfire influence ( $WF$   
312 up to 4 ppb) could be discerned in the region studied in this work, and a larger influence ( $\sim 10$ -15 ppb) was  
313 approximately quantified in urban areas of the Pacific Northwest (Parrish et al., 2022).

314 There are additional anthropogenic emission sectors that may not have decreased over time, and hence could  
315 possibly bias our estimate of US background ODVs. These sources include emissions associated with oil and gas  
316 (O&G) exploration, drilling and production, which have increased over the past two decades in some regions of the  
317 Western US. In addition, nonroad equipment, such as construction equipment, lawn and garden equipment, and VCP  
318 emissions (Coggon et al., 2021) may be important in urban areas, and they have not received as much regulatory  
319 attention as anthropogenic emissions. The Supplement Section S5 of Parrish et al. (2022) analyzes time series of

320 ozone observations in the Bakken O&G basin located in North Dakota, and examines correlations of derived  $a$  and  $A$   
321 parameter values in West Coast urban areas. That discussion found no indications of a significant bias arising from  
322 these emissions sectors.

### 323 **S5. Value of exponential decrease time constant, $\tau$ , determined in Southern California, applied to the entire** 324 **southwestern US**

325 We have not found it possible to precisely determine the three parameters ( $a$ ,  $A$  and  $\tau$ ) of Equation 3 from a fit to  
326 most available US ODV time series. The analysis in the manuscript assumes that  $\tau$  in the southwestern US and  
327 Texas (as well as other states considered) is the same value as derived for southern California ( $\tau = 21.8 \pm 0.8$  years).  
328 This assumption follows from the perspective of other states closely following the lead of California in emission  
329 control efforts, and is supported by the excellent fits provided by Equation 3 to ODV time series throughout the US,  
330 as discussed above in Section S4.

331 Generally, it is not possible to precisely determine the three parameters ( $a$ ,  $A$  and  $\tau$ ) of Equation 3 from a fit to  
332 most available US ODV time series. Here, however we conduct two iterative, multivariate regression analyses,  
333 similar to that described in Section 2.4 of Parrish et al. (2017) and applied by Parrish and Ennis (2019) to the  
334 northeastern US. Simultaneous fits to several ODV time series improve the precision of the parameter  
335 determinations, allow alternate derivation of some parameter values, and provide alternate estimates of confidence  
336 limits for the derived parameter values. Two separate analyses, each analyzing eight ODV time series, are presented.  
337 The first analysis fits Equation 3 to ODV time series from the first eight Texas regions listed in Table S5 and  
338 illustrated in Figures 8 and S4; the western rural region is omitted due to its small range of recorded ODVs. An  
339 ODV time series for each region is obtained by averaging all ODVs collected in that region for each year of the  
340 temporal ranges indicated in Table S5. A separate exponential time constant,  $\tau_{Ho}$ , is derived for the Houston region,  
341 and a single parameter value for  $\tau$  is derived for the other seven regions. Values of these two  $\tau$  values and 16 total  
342 separate  $a$  and  $A$  parameter values for each of the eight regions are optimized in an iterative process that minimizes  
343 the sum of the squares of the deviations between the fit and the original mean ODV time series. The second analysis  
344 fits Equation 4 to the maximum ODV time series in the seven southwestern US urban areas discussed in Section 4.3  
345 and plotted as light red solid circles in Figures 5 and 6, and the maximum El Paso ODV time series plotted in Figure  
346 8. A similar iterative process attempts to optimize single common parameter values for  $\tau$  and the wildfire  
347 proportionality constant (i.e., the factor of 0.03 in Equation 4) for all areas, and separate  $a$  and  $A$  parameter values of  
348 each of the eight regions. For both analyses the 18 derived parameter values are given in Table S7, and Figure S9  
349 compares the fits of Equations 3 and 4 to the original ODV time series, both for the original fits discussed in the  
350 manuscript (upper graphs) and for the multivariate analyses (lower graphs).

351 The three derived  $\tau$  values (18.4 to 19.1 years) are up to 16% smaller than the southern California value of  $21.8 \pm$   
352  $0.8$  years, and are outside the 95% confidence limit of the California value. However, it is very difficult to force  
353 convergence of the Texas multivariate fit, and not possible for the southwestern US analysis due to anti-correlations  
354 between parameters. Notably, the agreement between the  $a$  and  $A$  parameter values between the original analysis  
355 (assuming derived  $\tau = 21.8 \pm 0.8$  years) and the multivariate analysis (83% overall) is usually within the confidence

356 limits of the original analysis, and these multivariate fits provided only very modest improvements over the original  
 357 fits in the overall  $r^2$  and RMSD values (compare final two rows in Table S7). Given this overall agreement, we are  
 358 confident in our application of the southern California value of  $\tau$  throughout the entire region studied in this work.

359 **Table S7.** Parameter values derived from multi-variate fits described in Section S3. All units are ppb ozone unless  
 360 otherwise noted, except for the dimensionless parameter,  $r^2$ .

| Texas region              | Original fits <sup>a</sup> | Multi-var fit  | SW US urban area                       | Original fits <sup>b</sup> | Multi-var fit <sup>c</sup> |
|---------------------------|----------------------------|----------------|----------------------------------------|----------------------------|----------------------------|
| $\tau$ (years)            | $21.8 \pm 0.8$             | $18.9 \pm 0.9$ | $\tau$ (years)                         | $21.8 \pm 0.8$             | $18.4 \pm 0.7$             |
| $\tau_{Ho}$ (years)       | $21.8 \pm 0.8$             | $19.1 \pm 2.2$ | prop. const. (year <sup>-1</sup> )     | 0.03                       | $0.116 \pm 0.19$           |
| Dallas - <i>A</i>         | $34.6 \pm 4.5$             | $30.3 \pm 1.7$ | Phoenix - <i>A<sub>WF</sub></i>        | $12.9 \pm 3.6$             | $12.8 \pm 1.9$             |
| Dallas - <i>a</i>         | $57.7 \pm 3.1$             | $61.6 \pm 1.3$ | Phoenix - <i>a</i>                     | $69.0 \pm 1.7$             | $70.5 \pm 1.7$             |
| Houston - <i>A</i>        | $43.2 \pm 4.2$             | $39.1 \pm 1.7$ | Tucson - <i>A<sub>WF</sub></i>         | $10.5 \pm 1.6$             | $10.6 \pm 1.3$             |
| Houston - <i>a</i>        | $53.9 \pm 3.2$             | $57.9 \pm 1.3$ | Tucson - <i>a</i>                      | $63.9 \pm 1.4$             | $63.1 \pm 1.6$             |
| El Paso - <i>A</i>        | $11.5 \pm 1.7$             | $9.2 \pm 0.6$  | Las Vegas - <i>A<sub>WF</sub></i>      | $16.1 \pm 6.6$             | $16.8 \pm 3.3$             |
| El Paso - <i>a</i>        | $64.6 \pm 1.8$             | $66.6 \pm 1.0$ | Las Vegas - <i>a</i>                   | $68.0 \pm 2.6$             | $67.6 \pm 2.1$             |
| San Antonio - <i>A</i>    | $26.6 \pm 6.3$             | $25.0 \pm 2.2$ | Reno - <i>A<sub>WF</sub></i>           | $7.0 \pm 1.3$              | $6.8 \pm 1.2$              |
| San Antonio - <i>a</i>    | $58.4 \pm 4.1$             | $60.4 \pm 1.4$ | Reno - <i>a</i>                        | $66.3 \pm 2.2$             | $66.1 \pm 1.6$             |
| Beau.-PA-LC - <i>A</i>    | $28.0 \pm 5.1$             | $25.5 \pm 2.2$ | Salt Lake City - <i>A<sub>WF</sub></i> | $15.6 \pm 2.0$             | $14.9 \pm 1.0$             |
| Beau.-PA-LC - <i>a</i>    | $54.7 \pm 3.4$             | $57.2 \pm 1.4$ | Salt Lake City - <i>a</i>              | $66.6 \pm 1.9$             | $66.3 \pm 1.5$             |
| So Coast Texas - <i>A</i> | $27.5 \pm 6.0$             | $25.6 \pm 2.2$ | Albuquer.-SF - <i>A<sub>WF</sub></i>   | $6.0 \pm 1.5$              | $6.9 \pm 1.1$              |
| So Coast Texas - <i>a</i> | $52.1 \pm 4.1$             | $54.2 \pm 1.4$ | Albuquer.-SF - <i>a</i>                | $66.2 \pm 1.8$             | $64.7 \pm 1.5$             |
| SW Texas - <i>A</i>       | $18.2 \pm 6.9$             | $16.7 \pm 2.1$ | Denver - <i>A<sub>WF</sub></i>         | $11.0 \pm 1.7$             | $13.4 \pm 0.8$             |
| SW Texas - <i>a</i>       | $49.8 \pm 4.9$             | $51.6 \pm 1.4$ | Denver - <i>a</i>                      | $69.0 \pm 2.1$             | $64.5 \pm 1.5$             |
| Tyler-LV-SP - <i>A</i>    | $37.3 \pm 6.8$             | $33.8 \pm 2.2$ | El Paso - <i>A<sub>WF</sub></i>        | $14.2 \pm 2.1$             | $15.1 \pm 0.9$             |
| Tyler-LV-SP - <i>a</i>    | $50.8 \pm 4.6$             | $54.2 \pm 1.4$ | El Paso - <i>a</i>                     | $64.6 \pm 1.8$             | $62.3 \pm 1.5$             |
| $r^2$ <sup>d</sup>        | 0.934                      | 0.936          | $r^2$ <sup>d</sup>                     | 0.770                      | 0.794                      |
| RMSD <sup>d</sup>         | 2.65                       | 2.61           | RMSD <sup>d</sup>                      | 3.42                       | 3.24                       |

361 <sup>a</sup> Fits described in Section 4 of the paper. Values are reproduced from Table S5.

362 <sup>b</sup> Fits described in Section 4 of the paper. Values are reproduced from Tables S3 and S4.

363 <sup>c</sup> Multivariate fit did not converge; these results were obtained after a large number of iterations of the fitting  
 364 routine.

365 <sup>d</sup>  $r^2$  and RMSD are the parameters for the linear regression fit between the actual ODVs and the fit function, as  
 366 shown in Figure S10.

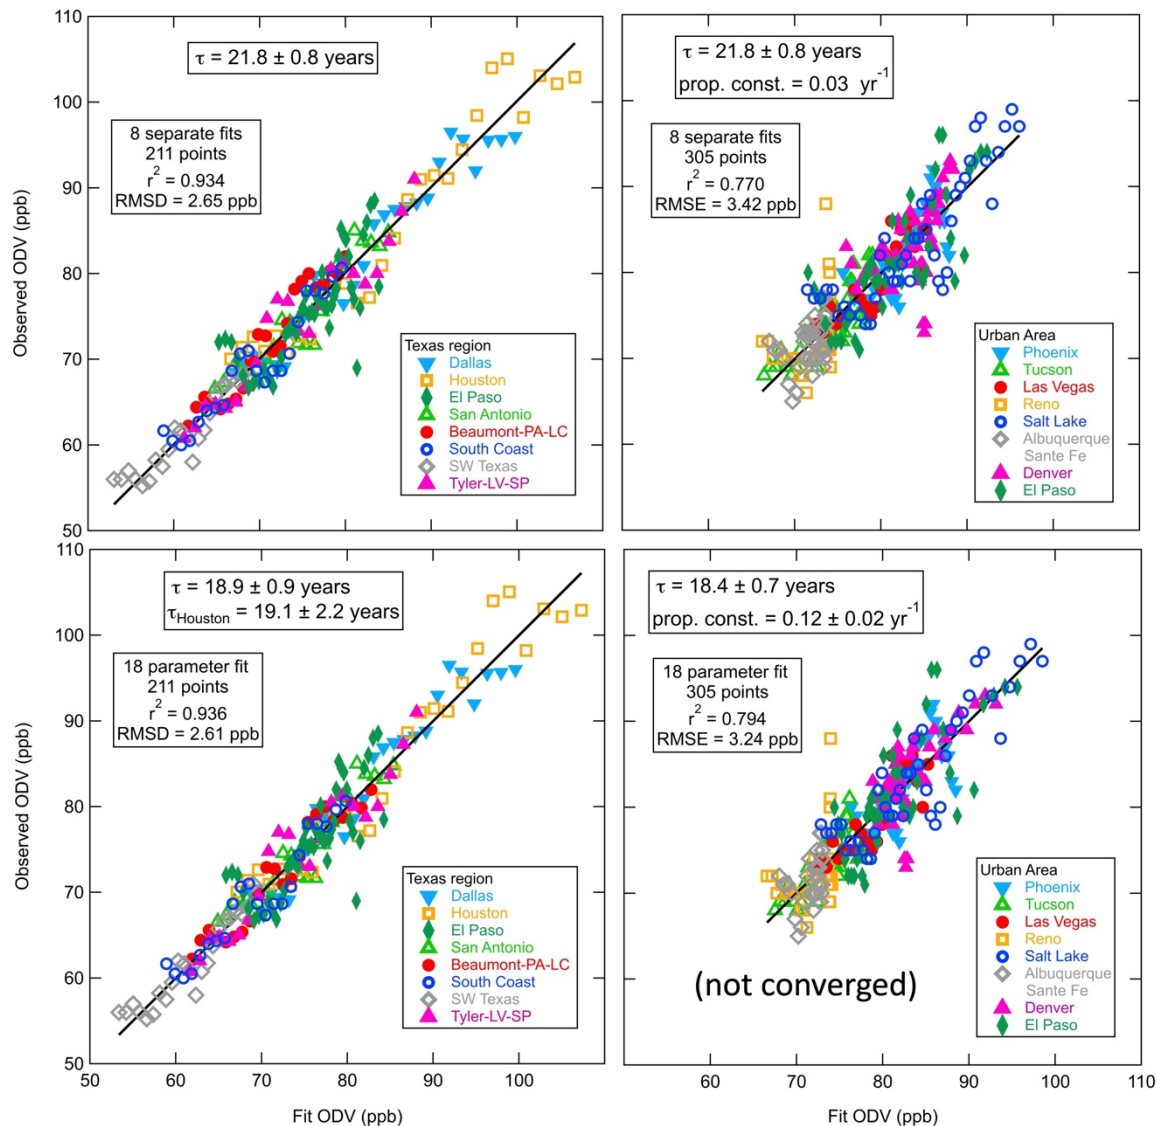

367  
 368 **Figure S9.** Comparison of observed ODVs with those from fits. The Texas regional and southwestern US urban  
 369 time series are on the left and right, respectively. The fits to individual time series from the paper are at the top and  
 370 the simultaneous multivariate fits to all of the time series are at the bottom. Black lines give the linear fit to all points  
 371 with the intercept held at zero; the slopes of all lines are within 0.0013 of unity, the value expected for a perfect fit.  
 372 The iterative process was not able to locate a unique minimum for the sum of the squares of the deviations for the 18  
 373 parameter fit to the southwestern US urban time series; this is attributed to poor constraints on all 18 parameters in  
 374 the that data set.

375 **S6. Effect of not considering the US Exceptional Event Rule**

376 In this work we utilize the ODVs tabulated in the data archive of the US EPA to quantify the maximum ozone  
 377 concentrations impacting surface monitoring sites, and to determine whether a site is approaching or exceeding the  
 378 NAAQS. It should be noted that if measurement data are influenced by exceptional events, such as wildfires (e.g.,

379 Jaffe et al., 2013) or stratospheric ozone intrusions (e.g., Langford et al., 2017), those data can, in principle, be  
380 removed from the MDA8 monitoring record, as uncontrollable “exceptional events”, thereby affecting the ODV  
381 archive. More details of the Exceptional Events Rule can be found on the US EPA website: [https://www.epa.gov/air-](https://www.epa.gov/air-quality-analysis/treatment-air-quality-data-influenced-exceptional-events-homepage-exceptional)  
382 [quality-analysis/treatment-air-quality-data-influenced-exceptional-events-homepage-exceptional](https://www.epa.gov/air-quality-analysis/treatment-air-quality-data-influenced-exceptional-events-homepage-exceptional). If a significant  
383 number of ODVs were affected by excluded data, then the ODV archive would not faithfully reflect the actual time  
384 series of maximum ozone concentrations, or the true relationship of the ozone concentrations at a site to the  
385 NAAQS. Data are excluded when the US EPA concurs with a state’s exceptional event demonstration.

386 The US EPA apparently does not maintain a data base of exceptional event concurrences, but so far as we can  
387 determine from an internet search, at the time of this writing, the US EPA has concurred with only one ozone  
388 exceptional event demonstration in the western US states examined in this paper since the implementation of the  
389 2016 Exceptional Events Rule. That event was on September 2 and 4, 2017 when wildfires in the Pacific Northwest  
390 impacted the National Renewable Energy Laboratory (NREL) ozone monitoring site operated in the greater Denver  
391 urban area. As a result of this concurrence the ODV at that site would be reduced by 1 ppb for the years 2017 (from  
392 80 to 79 ppb) and 2019 (from 77 to 76 ppb). In 2017, but not in 2019, this site recorded the maximum ODV in the  
393 Denver area, so the urban maximum ODV would be reduced by 1 ppb in 2017, but not affected in 2019. There was a  
394 second exceptional event concurrence by the US EPA under an earlier Exceptional Event Rule. That event was on  
395 June 14, 2012 when a stratospheric intrusion elevated ozone at two sites in the Upper Green River basin of western  
396 Wyoming (State of Wyoming; 2013; Kaldunski et al., 2017) enough that the recorded MDA8 ozone concentrations  
397 of 76 and 77 ppb exceeded the 2008 ozone NAAQS.

398 In summary, archived ODVs can be reduced by US EPA exceptional event concurrences; however, to date  
399 concurrences have been extremely limited, and therefore have not significantly affected the analysis presented in  
400 this paper. However, future concurrences may possibly affect application of the present analysis approach to coming  
401 years.

#### 402 **References not included in manuscript**

- 403 Coggon, M. M., Gkatzelis, G. I., McDonald, B. C., Gilman, J. B., Schwantes, R. H., Abuhassan, N., Aikin, K. C.,  
404 Arend, M. F., Berkoff, T. A., Brown, S. S., et al.: Volatile chemical product emissions enhance ozone and  
405 modulate urban chemistry, *Proceedings of the National Academy of Sciences* 118 (32):e2026653118.  
406 doi:10.1073/pnas.2026653118, 2021.
- 407 Guo, J.J., Fiore, A.M., Murray, L.T., Jaffe, D.A., Schnell, J.L., Moore, C.T., and Milly, G.P.: Average versus high  
408 surface ozone levels over the continental USA: model bias, background influences, and interannual variability,  
409 *Atmos. Chem. Phys.*, 18, 12123–12140, doi.org/10.5194/acp-18-12123-2018, 2018.
- 410 Jaffe, D., Wigder, N., Downey, N., Pfister, G., Boynard, A., and Reid, S. B.: Impact of Wildfires on Ozone  
411 Exceptional Events in the Western US, *Environ. Sci. Technol.*, 47, 11065–11072,  
412 <https://doi.org/10.1021/es402164f>, 2013.
- 413 Kaldunski, B., Pierce, R. B., and Holloway, T.: When Stratospheric Ozone Hits Ground-level Regulation:  
414 Exceptional Events in Wyoming *Bull. Am. Meteorol. Soc.*, 98(5), 889-892, doi:10.1175/BAMS-D-14-00133.1,  
415 2017.

416 Parrish, D. D., Aikin, K. C., Oltmans, S. J., Johnson, B. J., Ives M., and Sweeny, C.: Impact of transported  
417 background ozone inflow on summertime air quality in a California ozone exceedance area, *Atmos. Chem.*  
418 *Phys.*, 10, 10093–10109, doi:10.5194/acp-10-10093-2010, 2010.

419 State of Wyoming: Exceptional Event Demonstration Package for the Environmental Protection Agency: Big Piney  
420 and Boulder, Wyoming Ozone Standard Exceedances June 14, 2012, edited, Department of Environmental  
421 Quality/Air Quality Division, 2013.

422 US EPA: Integrated Science Assessment (ISA) for Ozone and Related Photochemical Oxidants (Final Report, Apr  
423 2020). U.S. Environmental Protection Agency, Washington, DC, EPA/600/R-20/012, 2020.

424 von Engel, A., and Teixeira, J.: A Planetary Boundary Layer Height Climatology Derived from ECMWF  
425 Reanalysis Data, *J. of Climate*, 26(17), 6575–6590, <https://doi.org/10.1175/JCLI-D-12-00385.1>, 2013.
